# Supplementary material for: Localization of ZIP14 and ZIP8 in HIBCPP Cells
Source: Brain Sci. 2020 Aug 8;10(8):534. doi: 10.3390/brainsci10080534 (PMC7464652; doi:10.3390/brainsci10080534)
Supplement: Supplementary file 1 [file brainsci-10-00534-s001.pdf]

## **Localization of ZIP14 and ZIP8 in HIBCPP cells**

**Shannon E. Morgan<sup>1</sup>, Horst Schrotten<sup>2</sup>, Hiroshi Ishikawa<sup>3</sup> and Ningning Zhao<sup>1\*</sup>**

<sup>1</sup> Department of Nutritional Sciences, University of Arizona, Tucson, AZ 85721, USA; morgans3@arizona.edu

<sup>2</sup> Department of Pediatrics, Pediatric Infectious Diseases, Medical Faculty Mannheim, Heidelberg University, 68167 Mannheim, Germany; horst.schrotten@umm.de

<sup>3</sup> Department of Neurosurgery, University of Tsukuba, Tsukuba, Ibaraki 305-8575, Japan; ishihiro.crm@md.tsukuba.ac.jp

\* Correspondence: zhaonn@arizona.edu; Tel.: +1-520-621-9744

**List of materials included:** Figures S1–S3

---

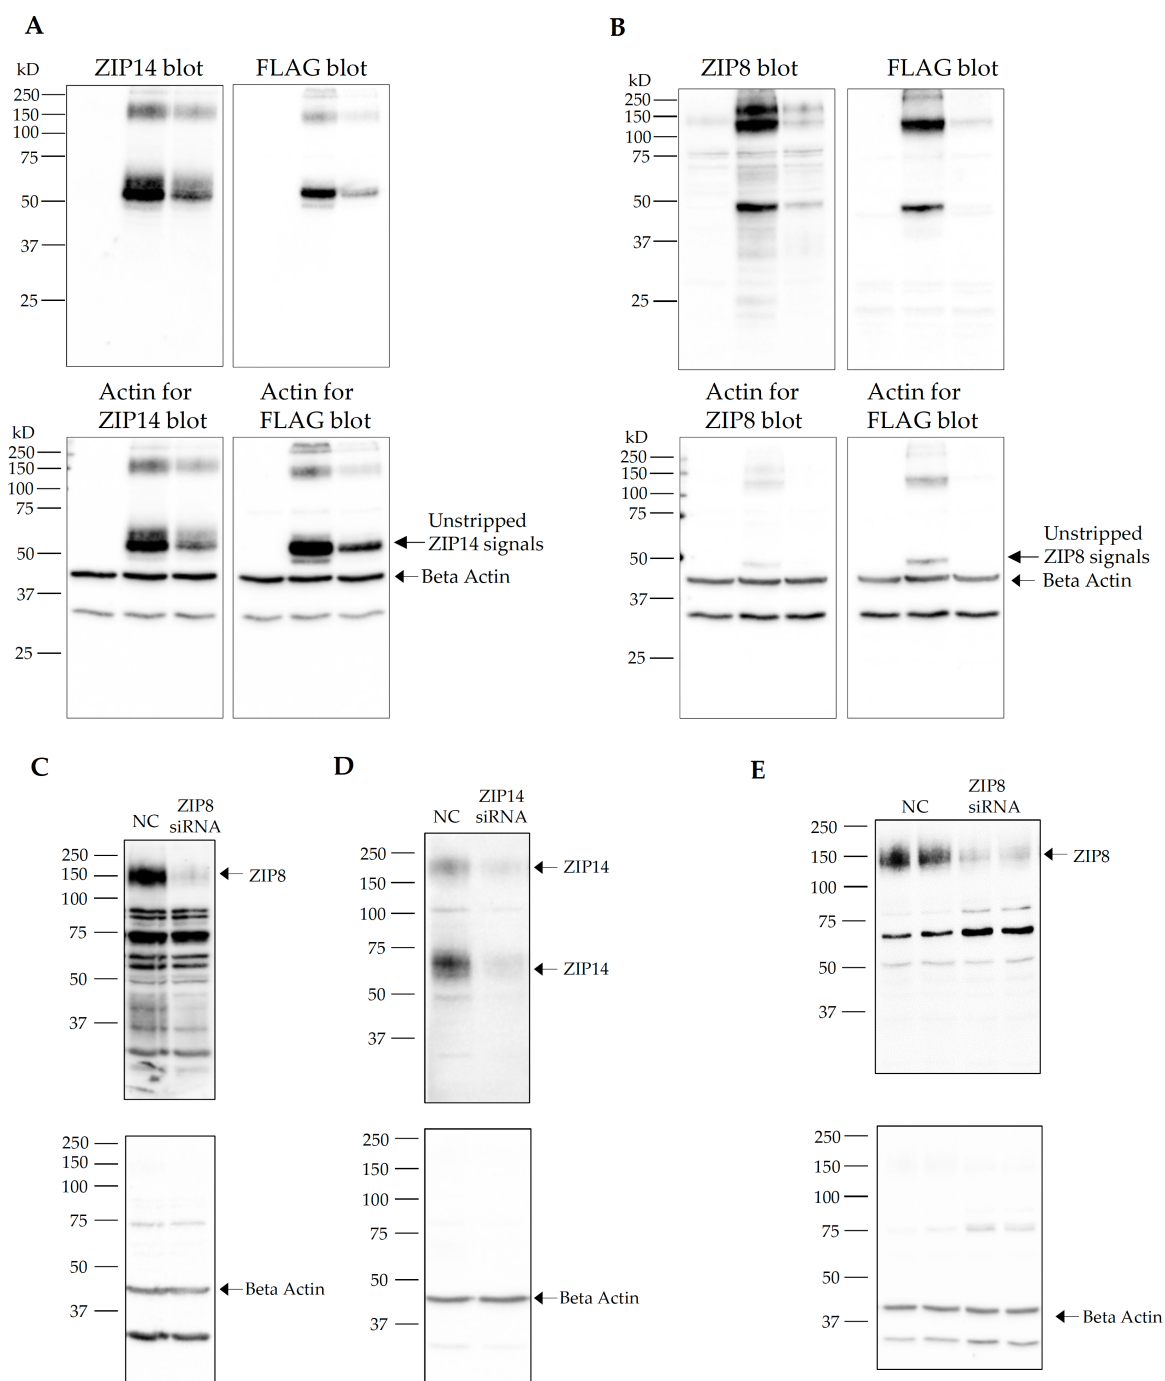

Figure S1. Uncropped immunoblots for Figure 2. (A) Full length blots for ZIP14, FLAG, and Beta Actin in Figure 2A. (B) Full length blots for ZIP8, FLAG, and Beta Actin in Figure 2B. (C) Full length blots for ZIP8 and Beta Actin in Figure 2C. (D) Uncropped blots for Figure 2D. (E) Uncropped blots for Figure 2E.

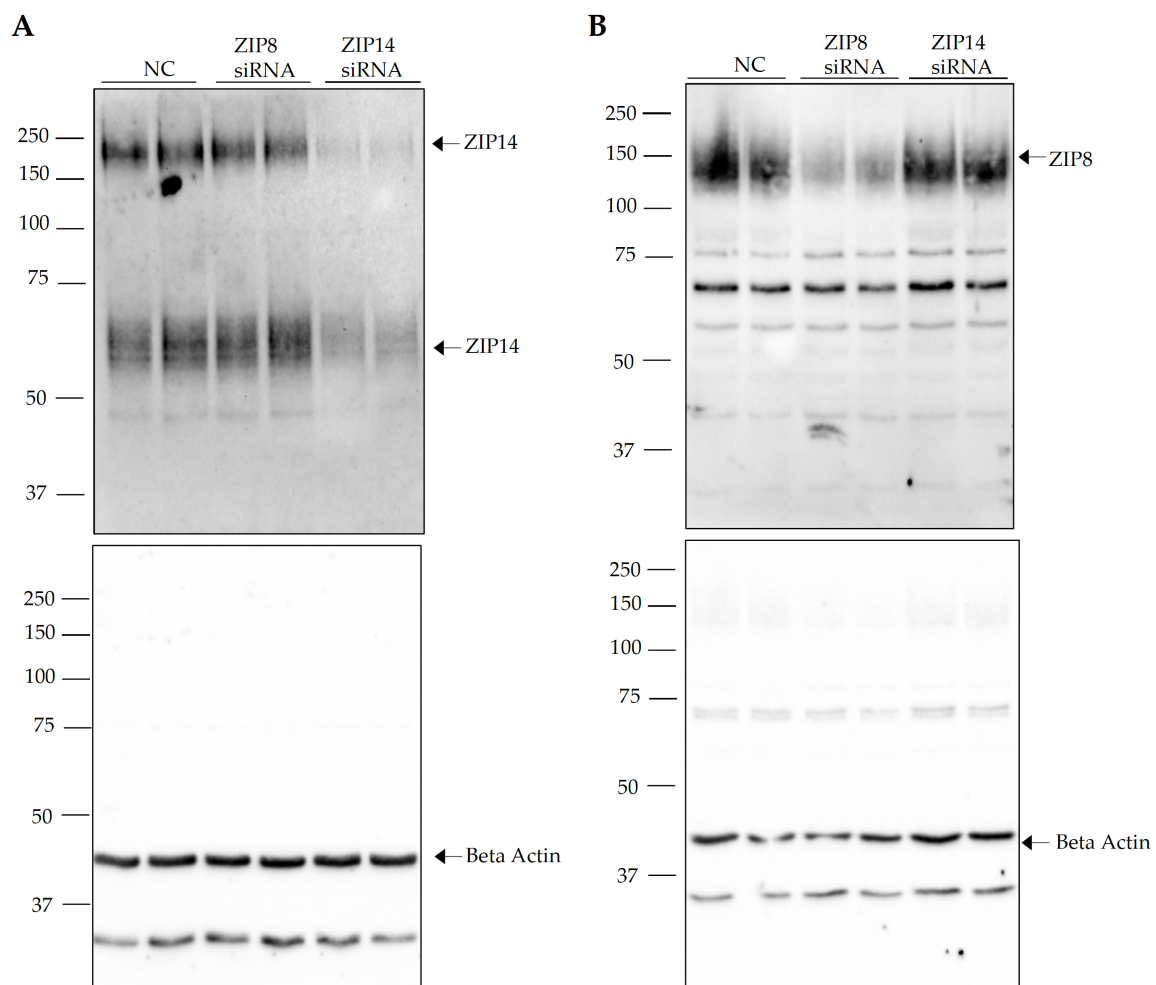

Figure S2. Uncropped immunoblots for Figure 3A. Full length blots for (A) ZIP14 and the loading control, and (B) ZIP8 and the loading control.

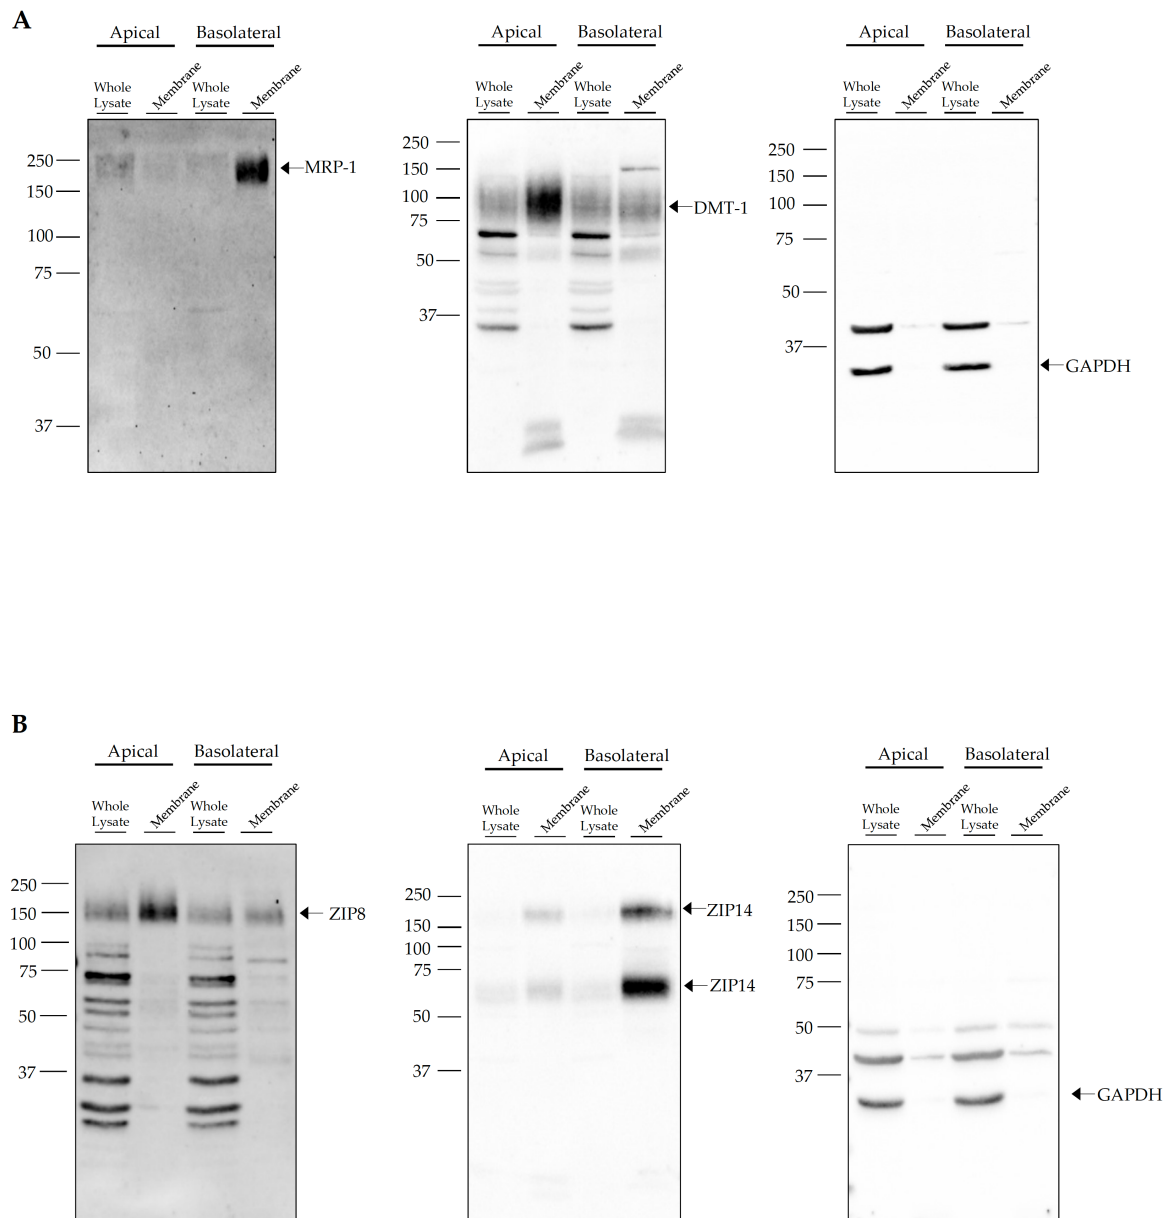

Figure S3. Uncropped immunoblots for Figure 5C and 5D. (A) Whole blots for MRP1, DMT1, and GAPDH in Figure 5C. (B) Whole blots for ZIP8, ZIP14, and GAPDH in Figure 5D.
